# Supplementary material for: In vivo multimodality imaging of miRNA-16 iron nanoparticle reversing drug resistance to chemotherapy in a mouse gastric cancer model
Source: Royal Society of Chemistry journal article supplement (doi:10.1039/c4nr03003f), 2014-01-01
Supplement: c4nr03003f1.pdf [file c4nr03003f1.pdf]

## Supplementary Information

### **In vivo Multimodality Imaging of miRNA-16 Iron Nanoparticle Reversing Drug Resistant to Chemotherapy in A Mouse Gastric Cancer Model**

Zhongchan Sun <sup>a,b,1</sup>, Xinxing Song <sup>b,c,1</sup>, Xiujuan Li <sup>b</sup>, Tao Su <sup>b</sup>, Shun Qi <sup>d</sup>, Ruirui Qiao <sup>e</sup>, Fu  
Wang <sup>f</sup>, Yi Huan <sup>d</sup>, Weidong Yang <sup>g</sup>, Jing Wang <sup>g</sup>, Yongzhan Nie <sup>h</sup>, Kaichun Wu <sup>h</sup>, Mingyuan Gao <sup>e</sup>,  
Feng Cao <sup>a,b\*</sup>

<sup>a</sup> Department of Cardiology, Chinese PLA General Hospital, Beijing , 100853, China

<sup>b</sup> Department of Cardiology & Molecular Imaging Program, Xijing Hospital, Fourth Military  
Medical University, Xi'an 710032, China

<sup>c</sup> Department of Cardiology, 285 Hospital, Handan 056001, China

<sup>d</sup> Department of Radiology, Xijing Hospital, Fourth Military Medical University, Xi'an 710032,  
China

<sup>e</sup> Institute of Chemistry, Chinese Academy of Sciences, Bei Yi Jie 2, Zhong Guan Cun, Beijing  
100190, China

<sup>f</sup> Life Sciences Research Center, School of Life Sciences and Technology, Xidian University,  
Xi'an 710071, China

<sup>g</sup> Department of Nuclear Medicine, Xijing Hospital, Fourth Military Medical University, Xi'an  
710032, China

<sup>h</sup> Department of Digestive Disease, Xijing Hospital, Fourth Military Medical University, Xi'an  
710032, China

<sup>l</sup> These authors contributed equally to this work and should be considered as co-first authors.

\*Correspondence to:

Feng Cao, MD, PhD

Department of Cardiology, Chinese PLA General Hospital, 28<sup>#</sup> Fuxing Street, Beijing , 100853,  
China

Department of Cardiology & Molecular Imaging Program, Xijing Hospital, Fourth Military  
Medical University, Xi'an 710032, China

Phone: 86-29-84771024

Fax: 86-29-84775183

Email: [wind8828@gmail.com](mailto:wind8828@gmail.com)

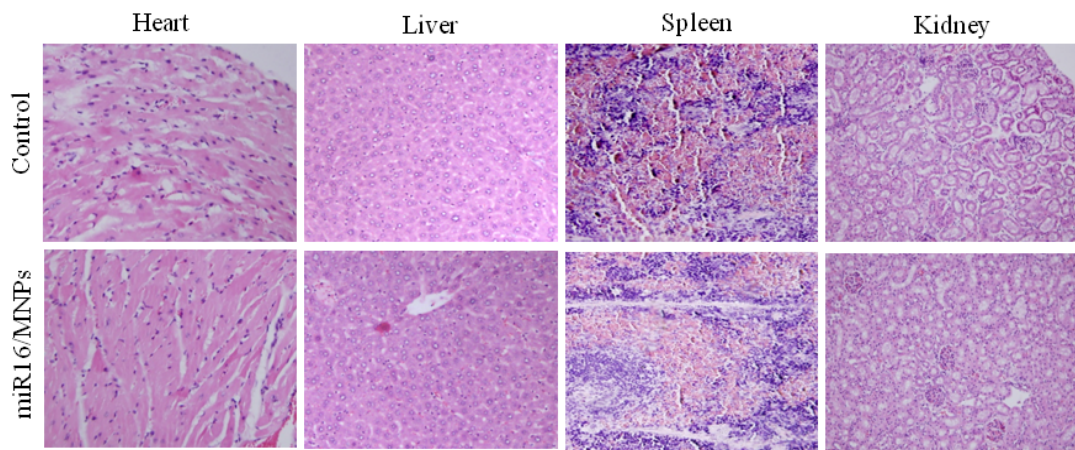

Figure S1. H&E stained images of major organs (heart, liver, spleen and kidney), harvested from mice at the end of treatment (day 28) with/without miR16/MNPs for several times.

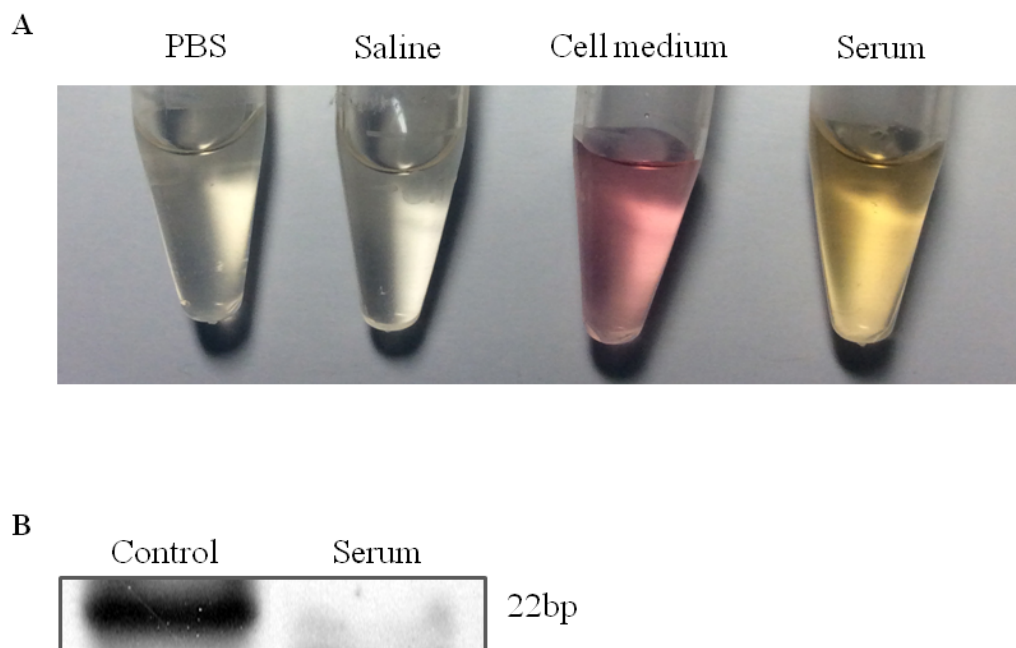

Figure S2. (A) The photographs of miR16/MNPs in various media such as PBS, saline, cell medium and serum. (B) Agarose gel electrophoresis for analysis of detached miR16 content in removed serum after centrifugation filtration.

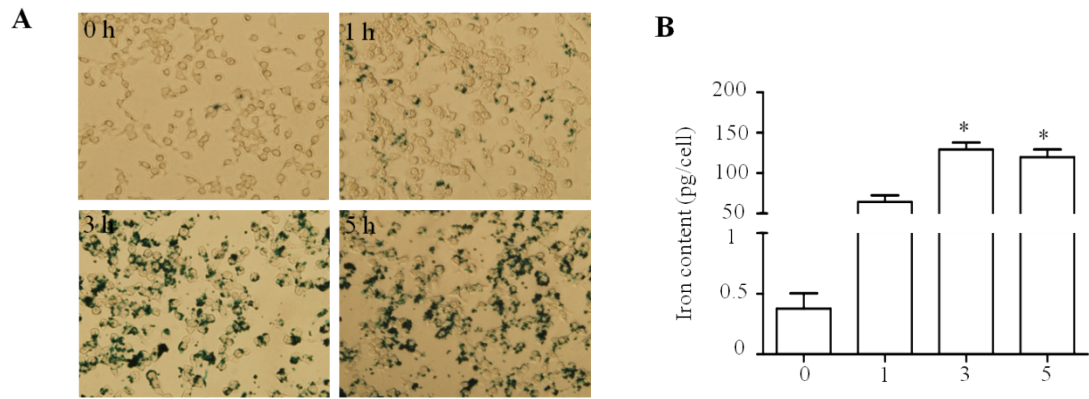

Figure S3. (A) Microscope images of Prussian blue dye stained SGC7901 cells at 0h,1h,3h and 5h after miR16/MNPs were added into the medium. The iron in the cells was stained blue. (B) FeIron accumulation in SGC7901 cells detected by ICP AES analysis. \* $P < 0.05$  compared with 1 h.

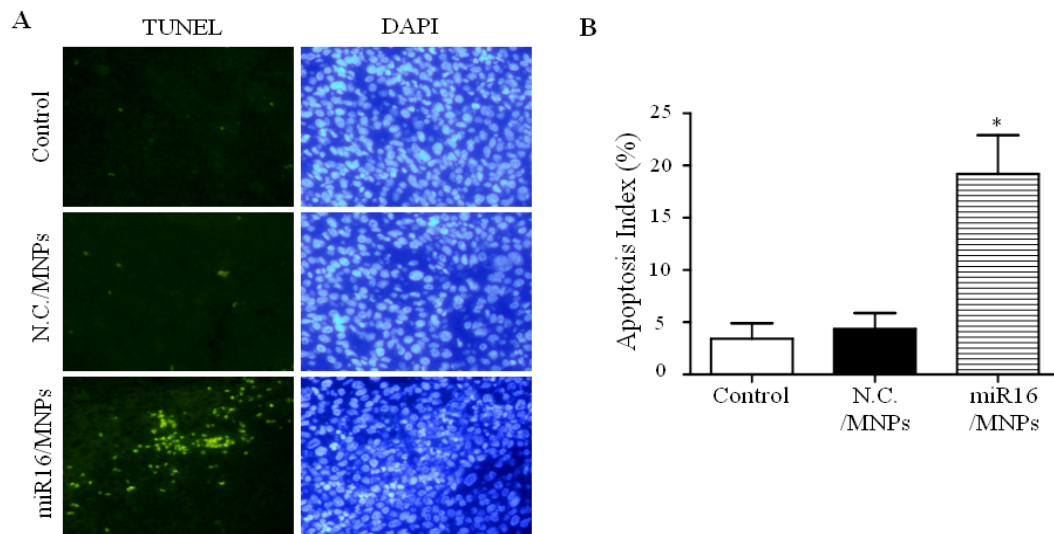

Figure S4. (A) and (B) Apoptotic cells within tumor samples were detected by TUNEL staining.

## Materials and Methods

## **TUNEL staining on tumor tissues**

After successful establishment of xenografted tumor model, mice were subjected to ADR treatment with or without miR16/MNPs. At the end of treatment, mice in different groups were sacrificed to collect tumor samples. Apoptotic cells within tumor was determined by terminal deoxynucleotidyl transferase-mediated dUTP-biotin nick end labeling (TUNEL) assay using an in situ cell death detection kit (Roche Molecular Biochemicals, Mannheim, Germany). A double-staining technique was used, in brief, TUNEL staining for apoptotic cell nuclei and 4,6-diamino-2-phenylindole (DAPI) staining for all cell nuclei as. The index of apoptosis was expressed by the number of positively stained apoptotic cells/the total number of cells counted $\times$ 100%.
